# Supplementary material for: Atomic-level localization of π-electrons in defect engineered tri-s-triazine units for increased photocatalytic hydrogen generation of polymeric carbon nitride
Source: Royal Society of Chemistry journal article supplement (doi:10.1039/d1cy00938a), 2021-01-01
Supplement: d1cy00938a1.pdf [file d1cy00938a1.pdf]

## Supporting Information

### **Atomic-Level Localization of $\pi$ -Electrons in Defect Engineered Tri-s-triazine Units for Increased Photocatalytic Hydrogen Generation of Polymeric Carbon Nitride**

Mengqi Xue,<sup>a†</sup> Daochuan Jiang,<sup>a†</sup> Haiwei Du,<sup>a</sup> Zhongjun Li,<sup>b,\*</sup> Hong Bi,<sup>a</sup> and Yupeng Yuan<sup>a,c,d\*</sup>

<sup>a</sup> *School of Chemistry and Chemical Engineering, Anhui Province Key Laboratory of Chemistry for Inorganic/Organic Hybrid Functionalized Materials, Anhui University, Hefei, 230601, P. R. China.*

<sup>b</sup> *School of Electronic Science and Applied Physics, Hefei University of Technology, Hefei 230009, P. R. China*

<sup>c</sup> *Key Laboratory of Structure and Functional Regulation of Hybrid Materials (Anhui University), Ministry of Education, Hefei, 230601, P. R. China*

<sup>d</sup> *Energy Materials and Devices Key Lab of Anhui Province for Photoelectric Conversion, Hefei, 230601, P. R. China*

\*Corresponding authors

Emails: yupengyuan@ahu.edu.cn (Y. Yuan), and zjli@hfut.edu.cn (Z. Li)

† These authors contribute equally to this work.

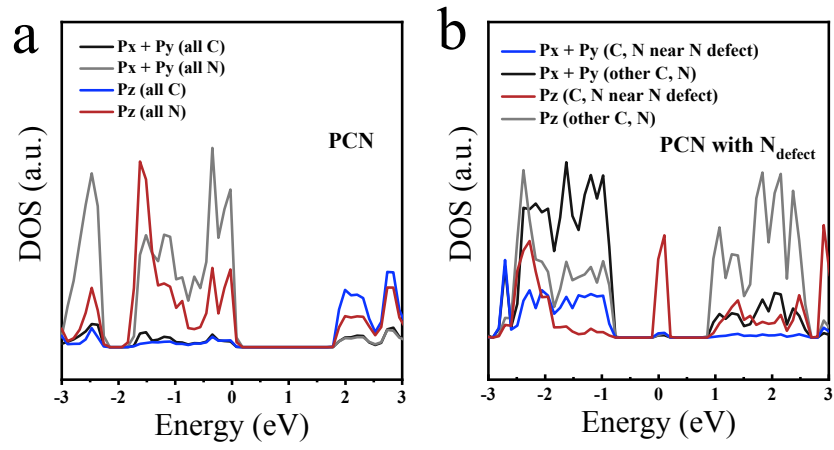

**Figure S1.** DOS for PCN (a) and N<sub>defect</sub> engineered PCN (b).

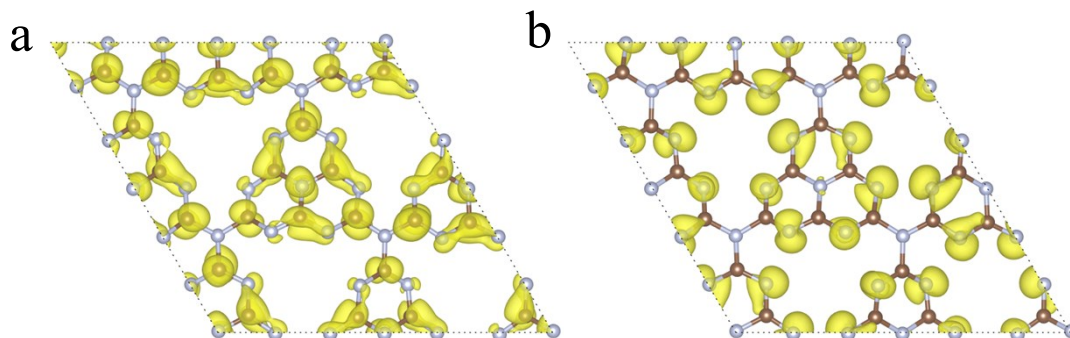

**Figure S2.** The charge density distributions of LUMO (a) and HOMO (b) orbitals for pristine PCN.

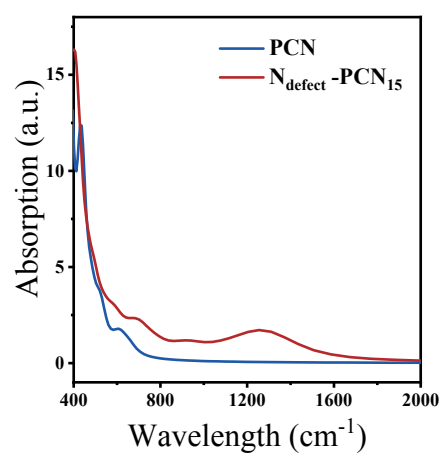

**Figure S3.** Calculated absorption coefficients for PCN and PCN with N defect.

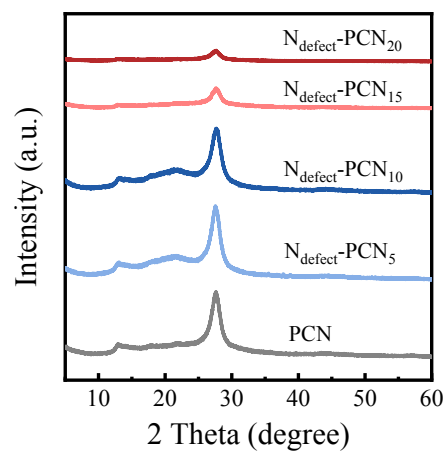

**Figure S4.** XRD patterns of different samples.

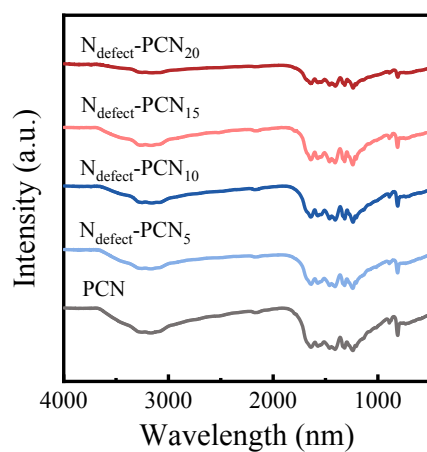

**Figure S5.** FTIR spectra of different samples.

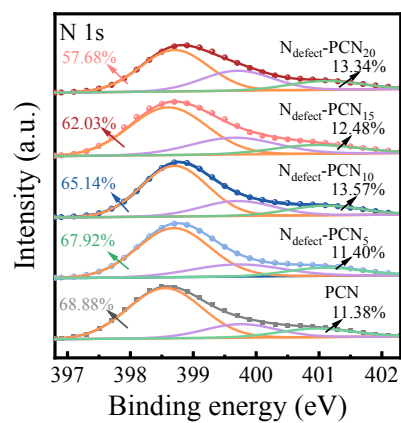

**Figure S6.** high-resolution XPS spectra of N 1s for PCN,  $N_{\text{defect}}\text{-PCN}_5$ ,  $N_{\text{defect}}\text{-PCN}_{10}$ ,  $N_{\text{defect}}\text{-PCN}_{15}$  and  $N_{\text{defect}}\text{-PCN}_{20}$ .

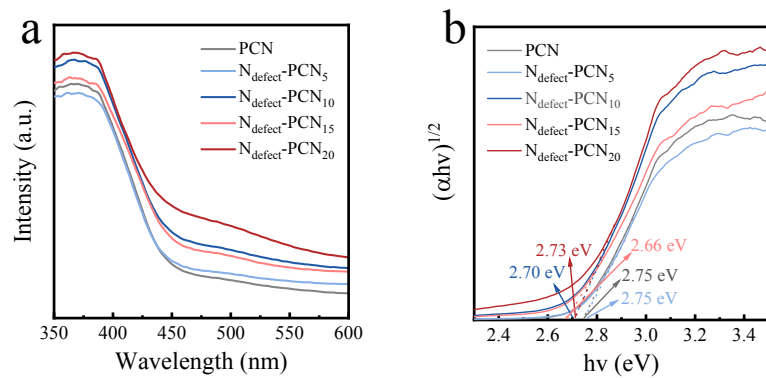

**Figure S7.** The UV-vis spectra (a) and Tauc plots of PCN,  $N_{\text{defect}}\text{-PCN}_5$ ,  $N_{\text{defect}}\text{-PCN}_{10}$ ,  $N_{\text{defect}}\text{-PCN}_{15}$ , and  $N_{\text{defect}}\text{-PCN}_{20}$ .



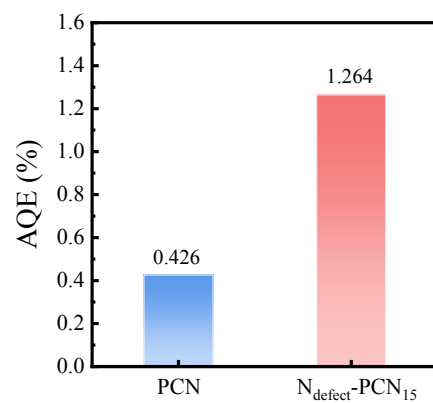

**Figure S8.** The AQE of PCN and PCN with N defect.

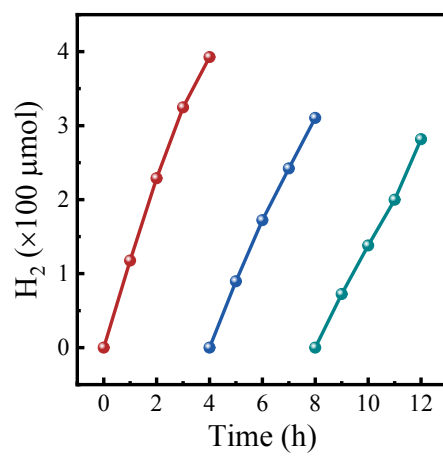

**Figure S9.** Stability test under consecutive runs of N<sub>defect</sub>-PCN<sub>15</sub>.

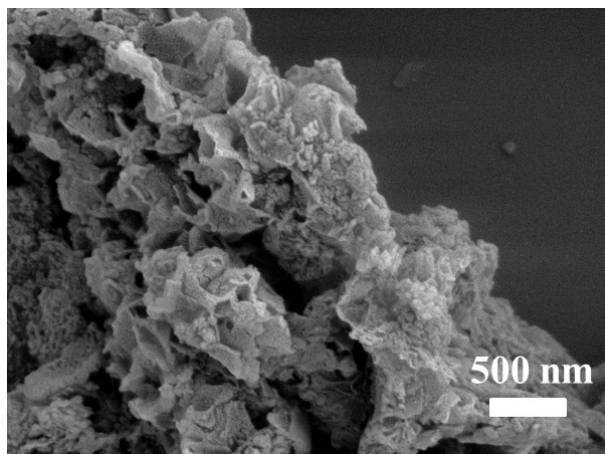

**Figure S10.** SEM image of N<sub>defect</sub>-PCN<sub>15</sub> after stability test.

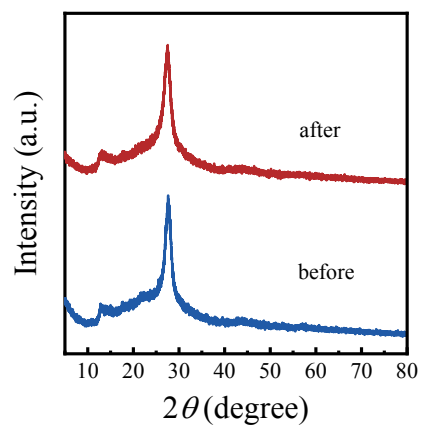

**Figure S11.** XRD patterns of  $N_{\text{defect}}\text{-PCN}_{15}$  before and after reaction.

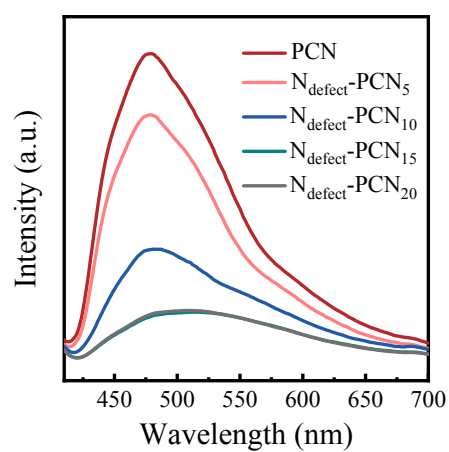

**Figure S12.** Steady state PL spectra of different samples.
